# Supplementary material for: Identification of markers for neurescence through transcriptomic profiling of postmortem human brains
Source: Research Square preprint supplement (doi:10.21203/rs.3.rs-5903682/v1), 2025-04-09
Supplement: Supplementary file 1 [file 2ceefad2598f5ed1f273aaa1.docx]

| **Cohorts** | **Mathys 2019** | **Zhou 2020** | **Xiong 2023** | **Mathys 2024** |
| --- | --- | --- | --- | --- |
| Number of brain samples | 48 | 32 | 92 | 48 |
| Number of samples with AD pathology | 24 | 19 | 44 | 26 |
| Median ± sd of age | 89.5 ± 4.4 | 89.3 ± 6.2 | 87.5 ± 3.8 | 87.5 ± 5 |
| Total number of cells (PFC ) | 80,000 | 70,000 | 400,000 | 255,000 |
| Senescent neurons  (CSP+, SIP+, & SenMayo+) | 475 | 255 | 124 | 1,178 |
| Non-Senescent neurons  (CSP-, SIP-, & SenMayo-) | 16,871 | 4,003 | 95,144 | 37,061 |
| Total excitatory neurons | 34,976 | 12,590 | 173,246 | 112,143 |
| Total inhibitory neurons | 9,196 | 3,727 | 61,056 | 40,290 |
