# Supplementary material for: Identification of markers for neurescence through transcriptomic profiling of postmortem human brains
Source: Research Square preprint supplement (doi:10.21203/rs.3.rs-5903682/v1), 2025-04-09
Supplement: Supplementary file 3 [file a17f20a8c0a3843cf10f1b2a.docx]

| Removed | Selected | **Accuracy** | | | | **Specificity** | | | | **Sensitivity** | | | |
| --- | --- | --- | --- | --- | --- | --- | --- | --- | --- | --- | --- | --- | --- |
|  |  | **Mathys 2019** | Zhou 2020 | Xiong 2023 | Mathys 2024 | **Mathys 2019** | Zhou 2020 | Xiong 2023 | Mathys 2024 | **Mathys 2019** | Zhou 2020 | Xiong 2023 | Mathys 2024 |
| - | *UQCRHL, ETS2* | 99% | 94% | 99% | 98% | 99% | 99% | 99% | 99% | 84% | 3% | 18% | 45% |
| ETS2 | *UQCRHL, CDKN2D* | 99% | 94% | 99% | 97% | 99% | 99% | 99% | 99% | 83% | 3% | 16% | 46% |
| *UQCRHL* | *CDKN2D, ETS2* | 99% | 98% | 99% | 99% | 100% | 100% | 100% | 99% | 83% | 77% | 63% | 89% |
| *UQCRHL, ETS2* | *CDKN2D, RB1* | 99% | 97% | 99% | 97% | 100% | 100% | 99% | 97% | 81% | 62% | 72% | 92% |
| *UQCRHL, ETS2, CDKN2D* | *E2F3, RB1* | 99% | 96% | 98% | 94% | 100% | 100% | 98% | 94% | 67% | 43% | 67% | 95% |
| *UQCRHL, ETS2, RB1* | *CDKN2D, CDK6* | 99% | 96% | 99% | 98% | 100% | 100% | 99% | 98% | 77% | 49% | 56% | 90% |
| *UQCRHL, ETS2, RB1, CDK6* | *CDKN2D, ATM* | 99% | 97% | 99% | 97% | 100% | 100% | 99% | 97% | 70% | 65% | 66% | 91% |
| *UQCRHL, ETS2, RB1, CDK6, CDKN2D* | *E2F3, RBL2* | 98% | 96% | 99% | 96% | 100% | 100% | 99% | 96% | 58% | 41% | 54% | 93% |
| *UQCRHL, ETS2, RB1, CDK6, ATM* | *CDKN2D, RBL2* | 99% | 97% | 99% | 98% | 100% | 100% | 99% | 98% | 73% | 65% | 58% | 90% |
| *UQCRHL, ETS2, RB1, CDK6, ATM, RBL2* | *CDKN2D, ATP6V1D* | 99% | 97% | 99% | 98% | 99% | 99% | 99% | 98% | 88% | 68% | 51% | 88% |
| *UQCRHL, ETS2, RB1, CDK6, ATM, RBL2, ATP6V1D* | *CDKN2D, E2F3* | 99% | 96% | 99% | 98% | 100% | 100% | 100% | 99% | 66% | 44% | 54% | 88% |
| *UQCRHL, ETS2, RB1, CDK6, ATM, RBL2, ATP6V1D, E2F3* | *CDKN2D, CES4A* | 99% | 97% | 99% | 98% | 99% | 99% | 99% | 98% | 82% | 69% | 37% | 84% |
