# Supplementary material for: Identification of markers for neurescence through transcriptomic profiling of postmortem human brains
Source: Research Square preprint supplement (doi:10.21203/rs.3.rs-5903682/v1), 2025-04-09
Supplement: Supplementary file 5 [file e5786f3218c4ce76db1006b9.docx]

| **Column number** |  | **1** | **2** | **3** | **4** | **5** | **6** | **7** |
| --- | --- | --- | --- | --- | --- | --- | --- | --- |
| **Criteria for positive neurons** |  | CSP+ | SIP+ | SenMayo+ | CSP+ & SIP+ & SenMayo+ | | CSP+ & SIP+ & SenMayo+ | |
| **Gene set**  **(number of genes)** |  | CSP  (22) | SIP  (44) | SenMayo  (116) | **CSP, SIP, SenMayo**  **(180)** | | **CSP, SIP, SenMayo, DE**  **(499)** | |
| **Excluded gene** |  | None | None | None | None | Top gene removed*** | None | Top gene ‍removed |
|  | **Number of genes in the tree** |  | | | | | | |
| **Original count data** | 1 | CDKN2D (96%)* | SOD1 (98%) | HMGB1 (97%) | MAP2K1 (99%) | CDKN2D (98%) | DPYSL2 (99%) | CALM3 (99%) |
| 2 | CDKN2, RB1 (99%) | SOD1, GSK3B (99%) | HMGB1, ETS2 (98%) | MAP2K1, CDKN2D (99%) | CDKN2D, HMGB1 (99%) | DPYSL2, ATP6V1H (99%) | CALM3, SH3GL2 (99%) |
| **Binary data** | 1 | CDKN2D (96%) | HRAS (95%) | Not found | Not found | Not found | Not found | Not found |
| 2** | CDKN2, RB1 (99%) | GAAD4, HRAS, MAPK14 (97%) | ETS2, CTSB (98%) | CDKN2D, ETS2 (99%) | E2F3, RB1 (99%) | UQCRHL, ETS2 (99%) | CDKN2D, RB1(99%) |
