# Supplementary material for: Identification of markers for neurescence through transcriptomic profiling of postmortem human brains
Source: Research Square preprint supplement (doi:10.21203/rs.3.rs-5903682/v1), 2025-04-09
Supplement: Supplementary file [file 3d68a091cd551efcd871c68d.pdf]

Supplementary material

Row 2

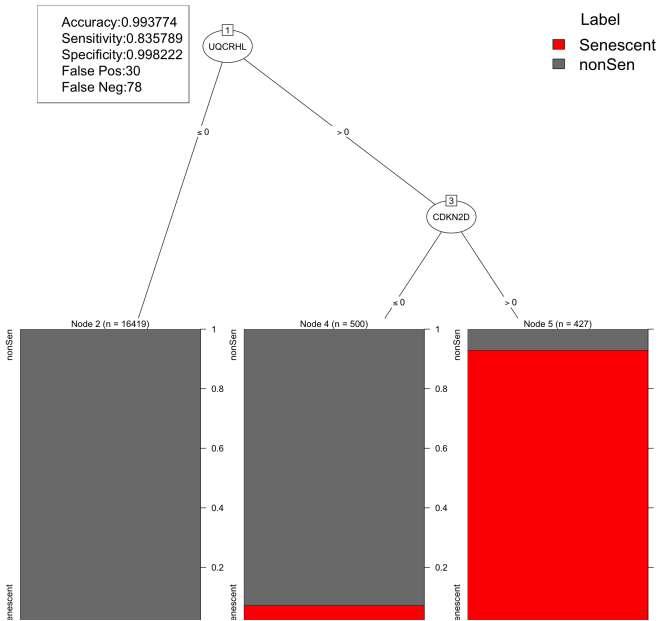

Row 3

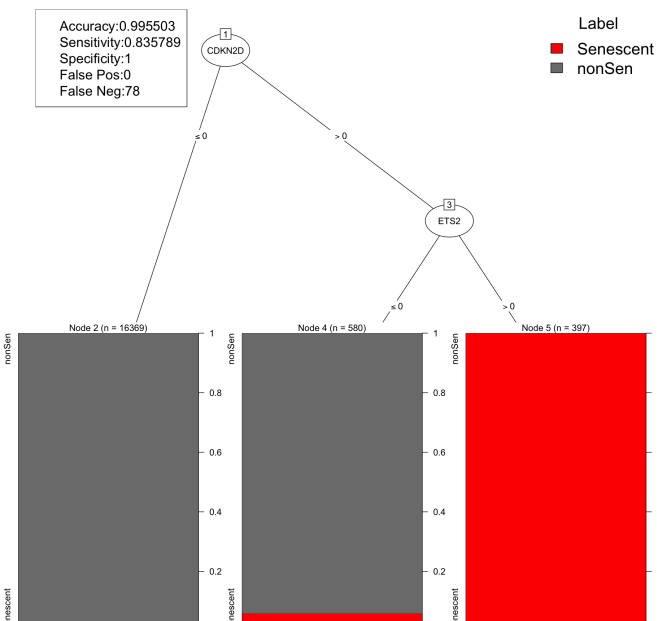

Row 4

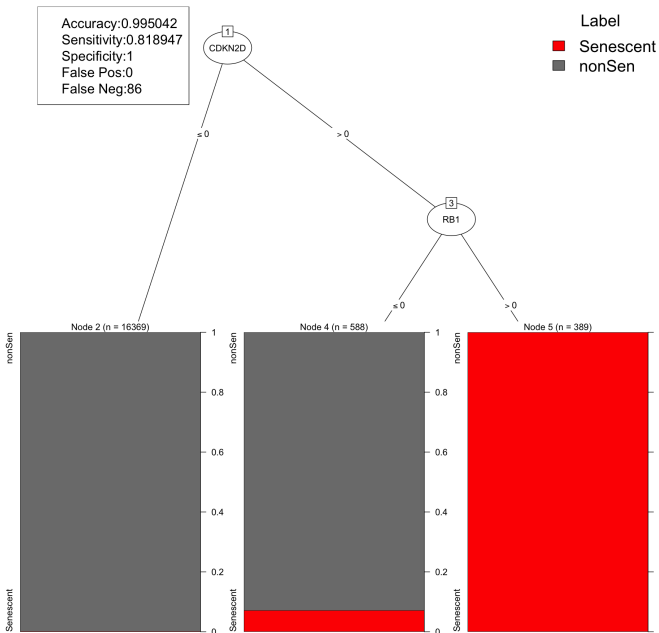

Row 5

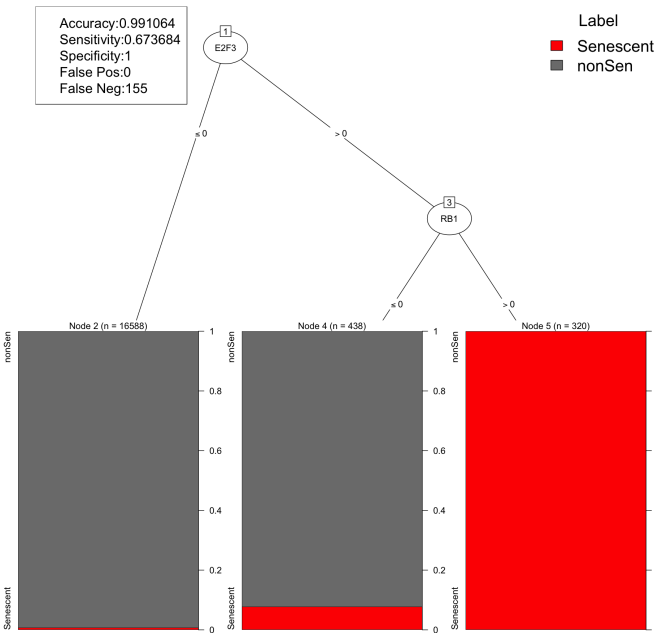

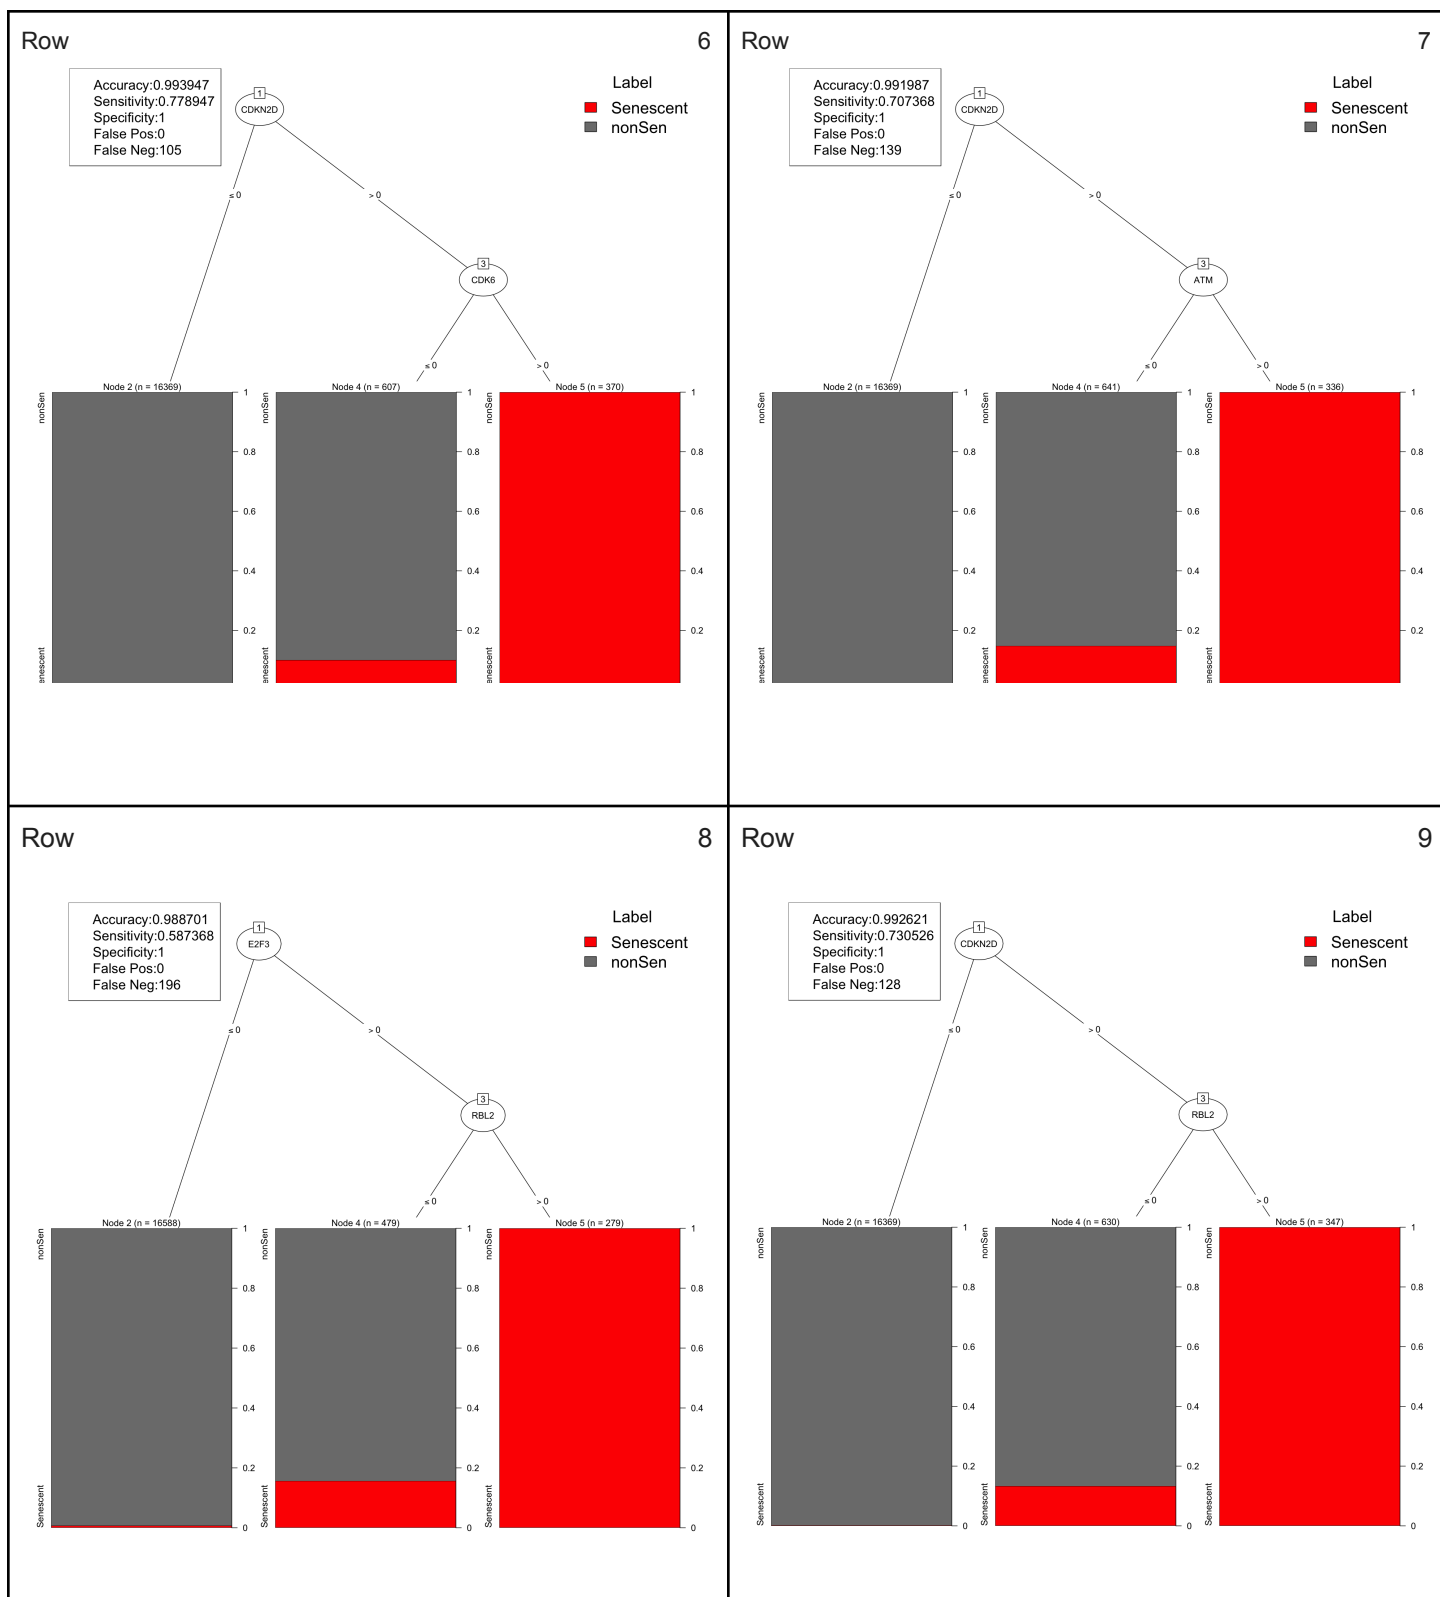

**Figure S1.** The decision trees correspond to rows of Table 3. All trees are based on binary transformation of Mathys 2019 discovery dataset.

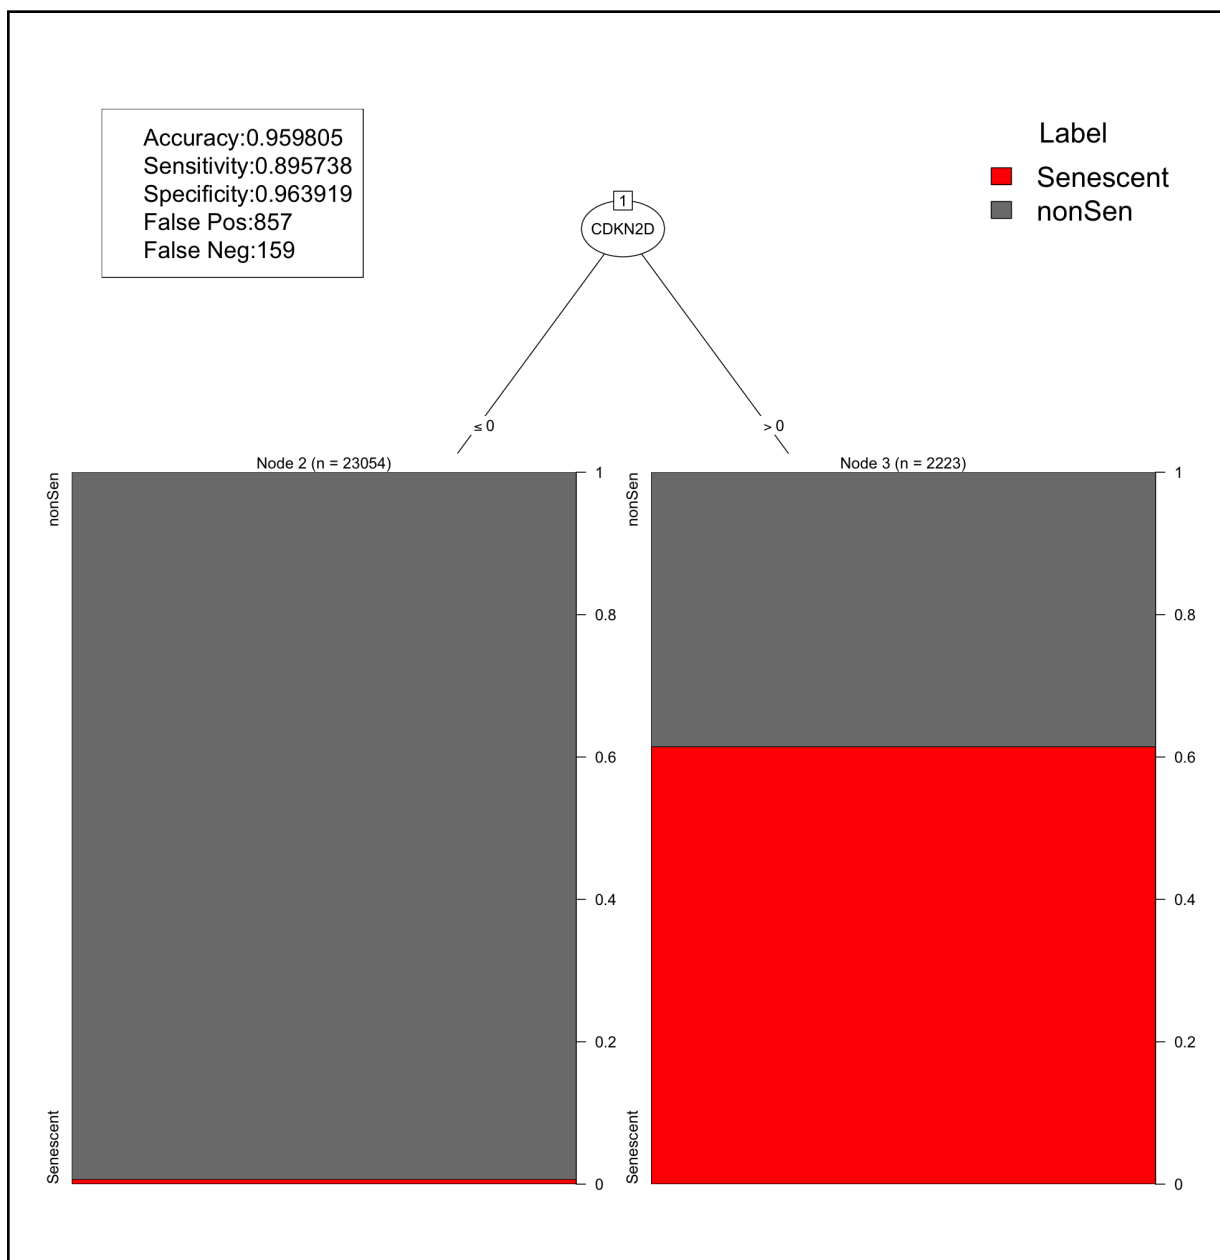

**Figure S2.** Decision tree trained based on one gene list (CSP) and one marker only, led to significantly lower sensitivity and specificity.

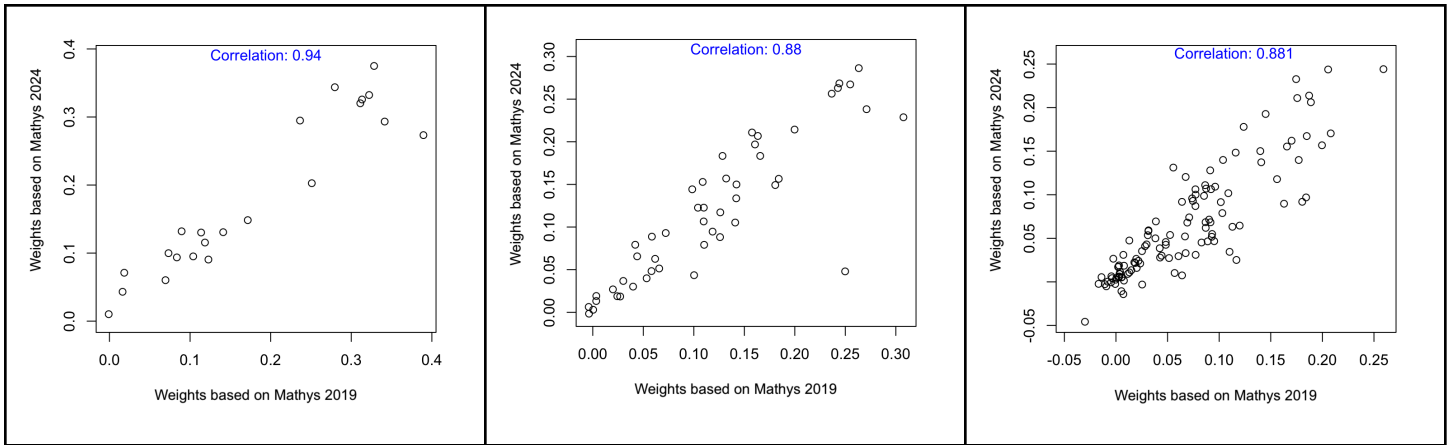

**Figure S3.** Concordance of eigengene weights between Mathys 2019 and Mathys 2024 discovery datasets. Each panel shows scatter plots comparing gene weights derived from the Mathys 2019 dataset (x-axis) versus those derived from the Mathys 2024 dataset (y-axis), calculated independently for each of the three eigengenes: CSP (left), SIP (middle), and SenMayo (right)
